# Supplementary material for: Duration of hemodialysis associated with cardio-respiratory dysfunction and breathlessness: a multicenter study
Source: PeerJ. 2020 Nov 4;8:e10333. doi: 10.7717/peerj.10333 (PMC7648455; doi:10.7717/peerj.10333)
Supplement: Supplemental Information 1 — Characteristic hemodialysis patients and outcome variables. [file peerj-08-10333-s001.xlsx]

## Sheet: CKD_Project_Full_RE_X-section
ID	Age	sex	HD	cat_HD2type	MIP1	MEP1	walking1	Dx	FVC1	PP_FVC1	FEV1value	PP_FEV1	FVC1_lessthan70	FEV1_FVC1	type_of_lung	PEP_1	PP_PEP1	Breahlessness
1	56	male	10	2	110	98	432	11	2.16	50	2.2	53	0	101	restrictive	439	72.2	3
2	72	male	18	2	69	73	279	18	1.39	59	1.29	69	0	93	restrictive	198	53	5
3	31	male	2	1	75	48	460	2	3.44	78	3.44	93	1	100	restrictive	320	50	2
4	66	male	6	2	74	56	416	21	2.11	73	1.84	81	1	87	restrictive	165	45.2	3
5	59	male	3	1	42	73	180	3	3.56	103	3.22	126	1	90	normal	430	83	5
6	45	female	5	2	44	48	423	6	1.57	54	1.56	63	0	99	restrictive	250	65	4
7	68	male	1	1	86	95	356	2	2.16	72	1.95	85	1	90	restrictive	503	108	3
8	50	male	18	2	97	106	340	18	1.82	52	1.52	53	0	84	restrictive	304	57	3
9	60	female	14	2	51	35	339	14	1.58	61	1.52	73	0	96	restrictive	216	62	2
10	57	male	1.5	1	47	61	340	19	2.59	78	2.5	95	1	97	restrictive	404	79	3
11	64	male	11	2	96	89	322	13	2.17	67	1.88	76	0	87	restrictive	404	82	4
12	35	female	18	2	28	28	409	20	1.58	61	1.13	50	0	72	restrictive	86	24	5
13	42	female	3	1	64	74	460	3	1.67	63	1.63	71	0	97	restrictive	125	34	4
14	61	female	10	2	30	30	392	10	1.13	69.75	1.12	77.78	0	99	restrictive	178	89	4
15	63	male	2	1	99	63	304	2	2.6	74	2.58	97	1	99	restrictive	384	72	4
16	60	male	4	1	68	70	430	6	1.75	56	1.75	71	0	100	restrictive	253	52	4
17	49	male	6	2	164	108	437	6	3.36	78	3.04	91	1	90	restrictive	467	67	4
18	42	male	5	2	81	76	420	5	3.62	78	3.12	85	1	86	restrictive	397	61	3
19	53	male	2	1	75	113	400	2	1.8	52	1.73	62	0	96	restrictive	297	56	5
20	30	male	2	1	50	60	440	2	2.39	58	2.27	66	0	94	restrictive	188	33	4
21	61	male	5	2	67	55	375	5	2.83	75	2.77	97	1	98	restrictive	302	53	3
22	65	male	4	1	57	82	255	6	2.72	82	2.72	107	1	100	normal	530	104	4
23	65	male	2	1	89	74	417	10	2.49	88	2.3	105	1	92	normal	287	64	5
24	68	male	2	1	25	41	214	5	1.88	59	1.74	73	0	93	restrictive	206	42	5
25	65	male	11	2	20	35	271	11	1	34	0.89	39	0	89	restrictive	137	30	3
26	55	female	6	2	30	36	80	6	1.14	38	1.12	46	0	98	restrictive	230	48	4
27	56	male	2	1	72	109	223	5	1.59	47	1.52	56	0	96	restrictive	242	46	4
28	71	male	3	1	31	39	216	10	1.6	53	1.57	69	0	98	restrictive	311	67	4
29	43	female	2	1	32	63	200	2	1.15	38	1.15	45	0	100	restrictive	178	45	4
30	65	female	2	1	81	71	457	3	1.43	66	1.35	75	0	94	restrictive	100	32	5
31	60	male	11	2	97	133	364	40	2.33	65	2.25	82	0	96	restrictive	313	58	3
32	51	male	2	1	69	63	411	2	2.19	52	2.12	52	0	97	restrictive	236	39	4
33	57	female	1	1	37	66	66	1	1.44	64	1.4	74	0	97	restrictive	149	46	2
34	43	female	11	2	41	58	350	11	1.19	47	1.15	50	0	97	restrictive	160	52	5
35	39	female	13	2	33	41	285	13	1.88	66	1.7	70	0	90	restrictive	170	45	2
36	49	male	2	1	73	88	429	4	2.85	68	2.59	76	0	91	restrictive	449	75	4
37	36	male	3	1	75	103	560	3	3.99	87	3.39	91	1	85	normal	509	80	3
38	43	female	3	1	43	63	454	3	2.49	89	1.98	83	1	80	normal	222	59	2
39	55	male	2	1	75	66	417	2	2.35	60	2.26	75	0	96	restrictive	256	44	5
40	34	female	11	2	29	75	491	11	2.45	77	2.28	83	1	93	restrictive	286	71	5
41	45	male	16	2	106	73	503	16	3.2	81	2.91	92	1	91	normal	541	94	2
42	43	female	2	1	92	91	509	2	2.62	97	2.42	105	1	92	normal	251	53	5
43	45	male	8	2	55	53	494	8	2.53	63	2.21	68	0	87	restrictive	271	46	4
44	65	female	10	2	21	34	329	10	1.3	64	1.23	73	0	95	restrictive	135	46	5
45	39	male	1	1	112	92	448	1	3.22	78	2.6	77	1	81	restrictive	391	66	5
46.1	35	female	6	2	21	24	338	6	1.87	67	1.76	72	0	97	restrictive	232	62	4
47	35	female	6	2	48	50	451	6	2.05	70	2.04	80	1	100	restrictive	352	91	5
48	37	female	9	2	51	82	420	9	1.82	71	1.82	62	1	100	restrictive	288	75	5
49	34	female	4	1	56	76	501	4	2.12	84	2.02	85	1	95	normal	304	83	4
50	54	male	7	2	59	78	443	7	2.05	58	1.89	67	0	92	restrictive	263	49	4
51	65	female	5	2	57	121	459	5	1.92	60	1.87	61	0	97	restrictive	312	65	4
52	47	male	10	2	47	94	405	11	2	58	2	72	0	100	restrictive	348	67	1
54	40	female	13	2	26	38	375	15	1.47	64	1.46	73	0	99	restrictive	205	63	1
55	42	female	7	2	31	41	508	7	2.06	66	1.96	75	0	95	restrictive	207	52	5
56	53	male	20	2	45	68	305	20	1.27	35	1.27	44	0	100	restrictive	271	58	4
57	34	male	3	1	101	105	330	5	2.88	70	2.86	77	1	99	restrictive	304	45	4
58	46	female	2	1	85	42	363	3	1.96	75	1.95	87	1	99	restrictive	199	93	4
59	61	male	5	2	65	146	280	5	1.31	40	1.28	49	0	98	restrictive	224	45	1
60	49	female	0.5	1	18	39	580	1	1.62	58	1.61	69	0	99	restrictive	248	78	4
61	37	male	2.5	1	76	122	445	3	2.12	48	2.11	51	0	100	restrictive	335	45	3
62	43	female	3	1	52	49	365	3	1.08	42	1.07	49	0	99	restrictive	290	82	3
63	58	male	1	1	50	21	280	1	1.57	42	1.34	43	0	85	restrictive	160	15	3
64	30	female	3	1	62	46	480	5	1.74	58	1.71	65	0	97	restrictive	224	58	5
66	52	male	2	1	99	101	605	2	2.76	78	2.58	78	1	95	restrictive	520	96	5
67	72	male	0.5	1	24	68	410	4	1.71	62	1.35	65	0	79	restrictive	91	21	3
68	68	male	13	2	40	38	353	13	0.47	15	0.47	16	0	100	restrictive	125	28	3
69	68	male	6	2	66	65	420	6	1.56	50	1.56	54	0	100	restrictive	402	95	2
70	35	male	3	1	43	24	428	3	3.4	77	3.08	85	1	100	restrictive	324	53	5
71	65	male	1	1	55	47	420	2	2.5	80	2.22	92	1	95	normal	385	80	4
72	41	female	7	2	47	41	310	7	0.76	29	0.7	31	0	96	restrictive	71	20	4
73	56	male	1	1	43	57	330	2	3.29	94	2.85	103	1	88	normal	385	72	5
74	54	male	17	2	18	40	220	17	2.3	62	2.2	75	0	100	restrictive	400	72	1
75	40	female	8	2	57	27	495	10	1.35	50	1.29	55	0	96	restrictive	166	45	3
76	60	female	3	1	61	53	302	3	0.67	33	0.66	38	0	99	restrictive	80	27	4
77	65	male	5	2	49	26	424	8	1.89	60	1.89	78	0	100	restrictive	266	55	4
78	48	male	5	2	110	138	508	5	2.53	66	2.53	82	0	100	restrictive	269	47	5
79	52	male	5	2	62	45	380	3	2.04	25	1.96	31	0	96	restrictive	362	26	4
80	56	female	3	1	32	49	396	3	1.68	72	1.58	81	1	94	restrictive	242	73	3
81	55	female	2	1	84	70	360	12	2.02	89	1.5	44	1	79	normal	102	16	3
82	64	male	4	1	102	59	80	12	1.36	48	1.23	47	0	90	restrictive	103	24	4
84	75	male	13	2	41	84	264	13	1.24	34	1.02	28	0	84	restrictive	125	25	1
85	49	male	1.5	1	106	71	305	1.5	2.28	60	2.06	57	0	91	restrictive	317	55	4
87	42	male	3	1	46	38	580	6	3.31	70	2.95	70	1	94	restrictive	25	33	5
89	56	male	2	1	124	119	420	3	3.25	100	2.82	94	1	93	normal	533	106	5
90	56	male	6	2	90	86	385	6	3.38	104	3.03	101	1	100	normal	621	124	3
91	66	female	5	2	38	59	250	2	1.38	69	1.15	66	0	85	restrictive	136	46	2
92	61	male	2	1	77	101	438	10	3.18	87	3.06	87	1	97	normal	394	74	5
93	59	male	6	2	79	126	350	1	2.63	71	2.62	74	1	100	restrictive	433	80	2
94	47	female	2	1	94	93	440	2	2.91	95	2.58	91	1	89	normal	259	54	5
95	47	male	4	1	82	99	390	4	3.09	76	2.74	72	1	89	restrictive	236	42	4
96	44	male	12	2	66	116	340	12	2.77	75	2.47	73	1	96	restrictive	428	75	5
97	45	male	3	1	48	53	280	3	2.52	61	2.52	64	0	100	restrictive	265	43	5
98	41	male	5	2	77	78	300	6	2.36	65	2.14	64	0	91	restrictive	287	50	4
99	46	female	10	2	43	56	260	10	1.62	66	1.42	65	0	91	restrictive	147	43	3
120	46	male	2	1	80	54	576	5	1.72	115	1.54	147	1	90	normal	206	110	5
137	50	male	0.5	1	102	131	557	1	1.72	51	1.63	60	0	95	restrictive	172	33	5
138	52	female	20	2	13	26	245	51	2.03	86	1.88	94	1	93	normal	363	109	5
139	44	female	13	2	16	13	273	29	1.25	50	1.25	42	0	100	restrictive	202	52	4
140	40	female	10	2	29	36	240	10	1.87	65	1.77	71	0	97	restrictive	149	39	2
141	56	female	12	2	37	27	245	12	0.96	40	0.92	46	0	96	restrictive	167	50	5
